# Supplementary material for: Cardiolipin-Dependent Properties of Model Mitochondrial Membranes from Molecular Simulations
Source: PubMed Central journal article supplement — Biophys J. 2019 Jul 2;117(3):429–44. doi: 10.1016/j.bpj.2019.06.023 (PMC6697365; doi:10.1016/j.bpj.2019.06.023), 2019-07-02
Supplement: mmc1.pdf [file mmc1.pdf]

**Biophysical Journal, Volume 117**

**Supplemental Information**

**Cardiolipin-Dependent Properties of Model Mitochondrial Membranes  
from Molecular Simulations**

**Blake A. Wilson, Arvind Ramanathan, and Carlos F. Lopez**

## 10 **Supporting Information Text**

### 11 **1. Radial distribution functions**

12 We estimated the cardiolipin (CL) centered radial distribution functions (RDFs) for the 7, 10, and 15 mol% CL bilayer systems.  
13 The RDFs were computed in the 2-dimensional lateral plane of the bilayer leaflets; each leaflet was separately analyzed and  
14 then averaged to generate the final RDF estimate. RDFs were estimated over a radial distance of 0 to 40 with a bin spacing of  
15 0.25 .

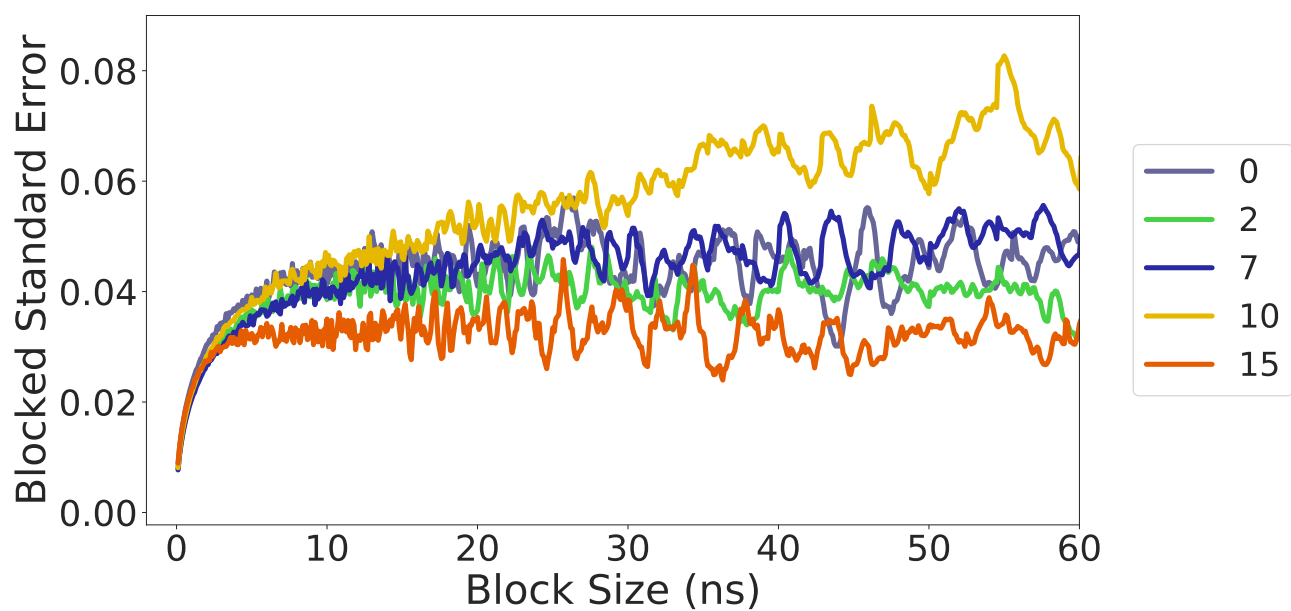

Fig. S1. \*\*Need to update the figure image to cutoff the block size around 60 ns. Blocked standard error analysis of the average area per lipid of each bilayer system.

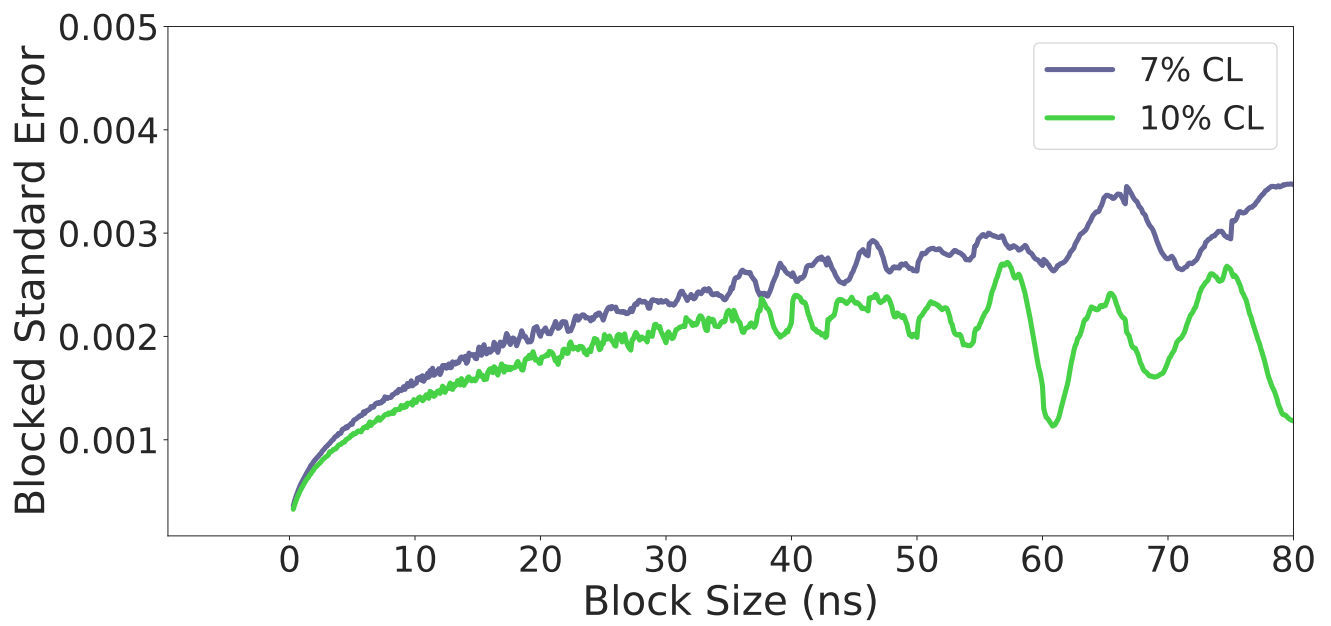

Fig. S2. Blocked standard error analysis of the CL-CL fractional interactions in the 7 and 10 % CL bilayers.

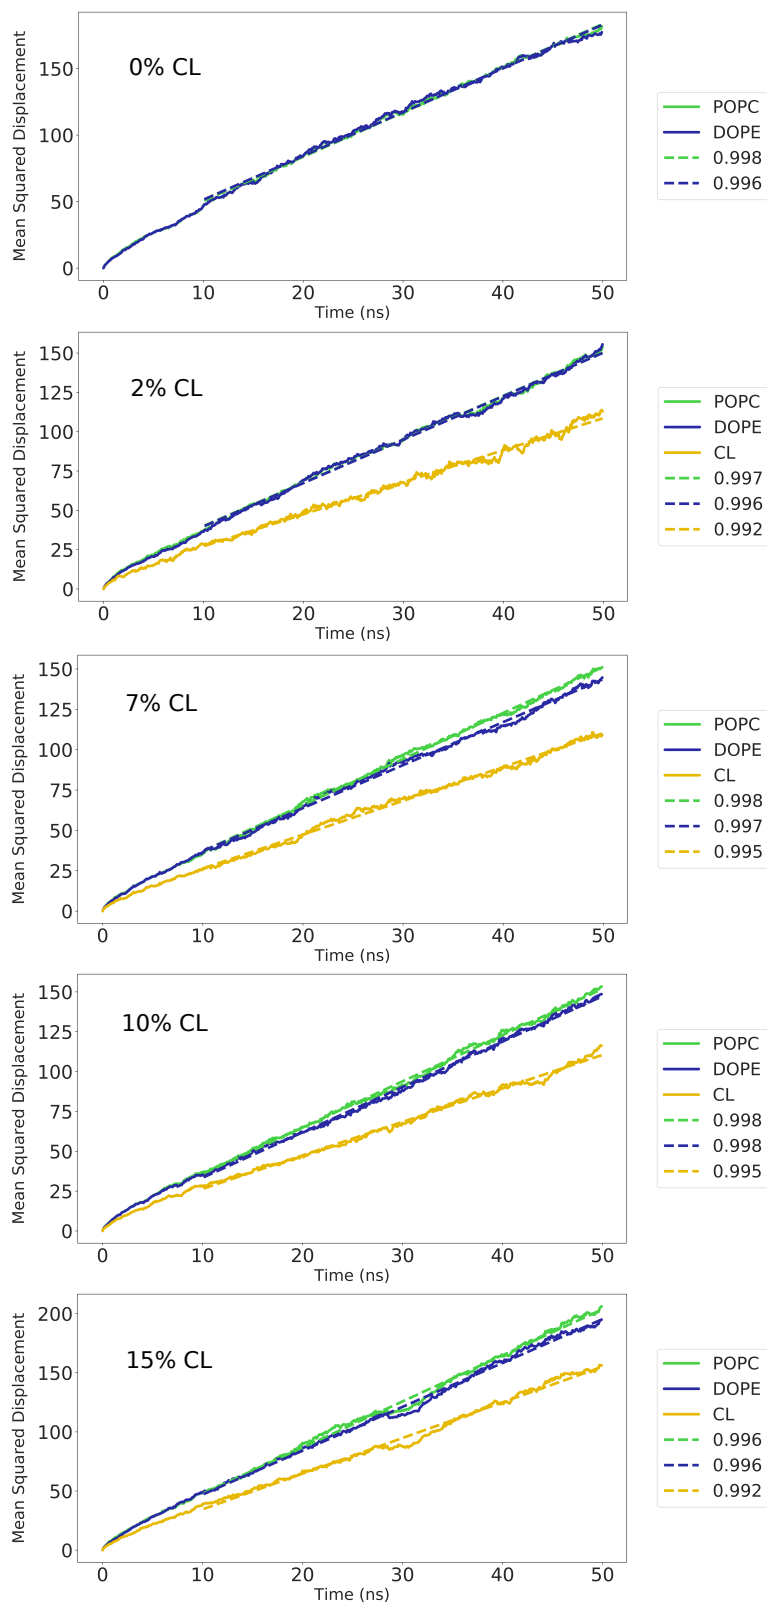

Fig. S3. Mean squared displacement versus change in time. The dashed lines show the linear fits with the R-squared values in the legend.

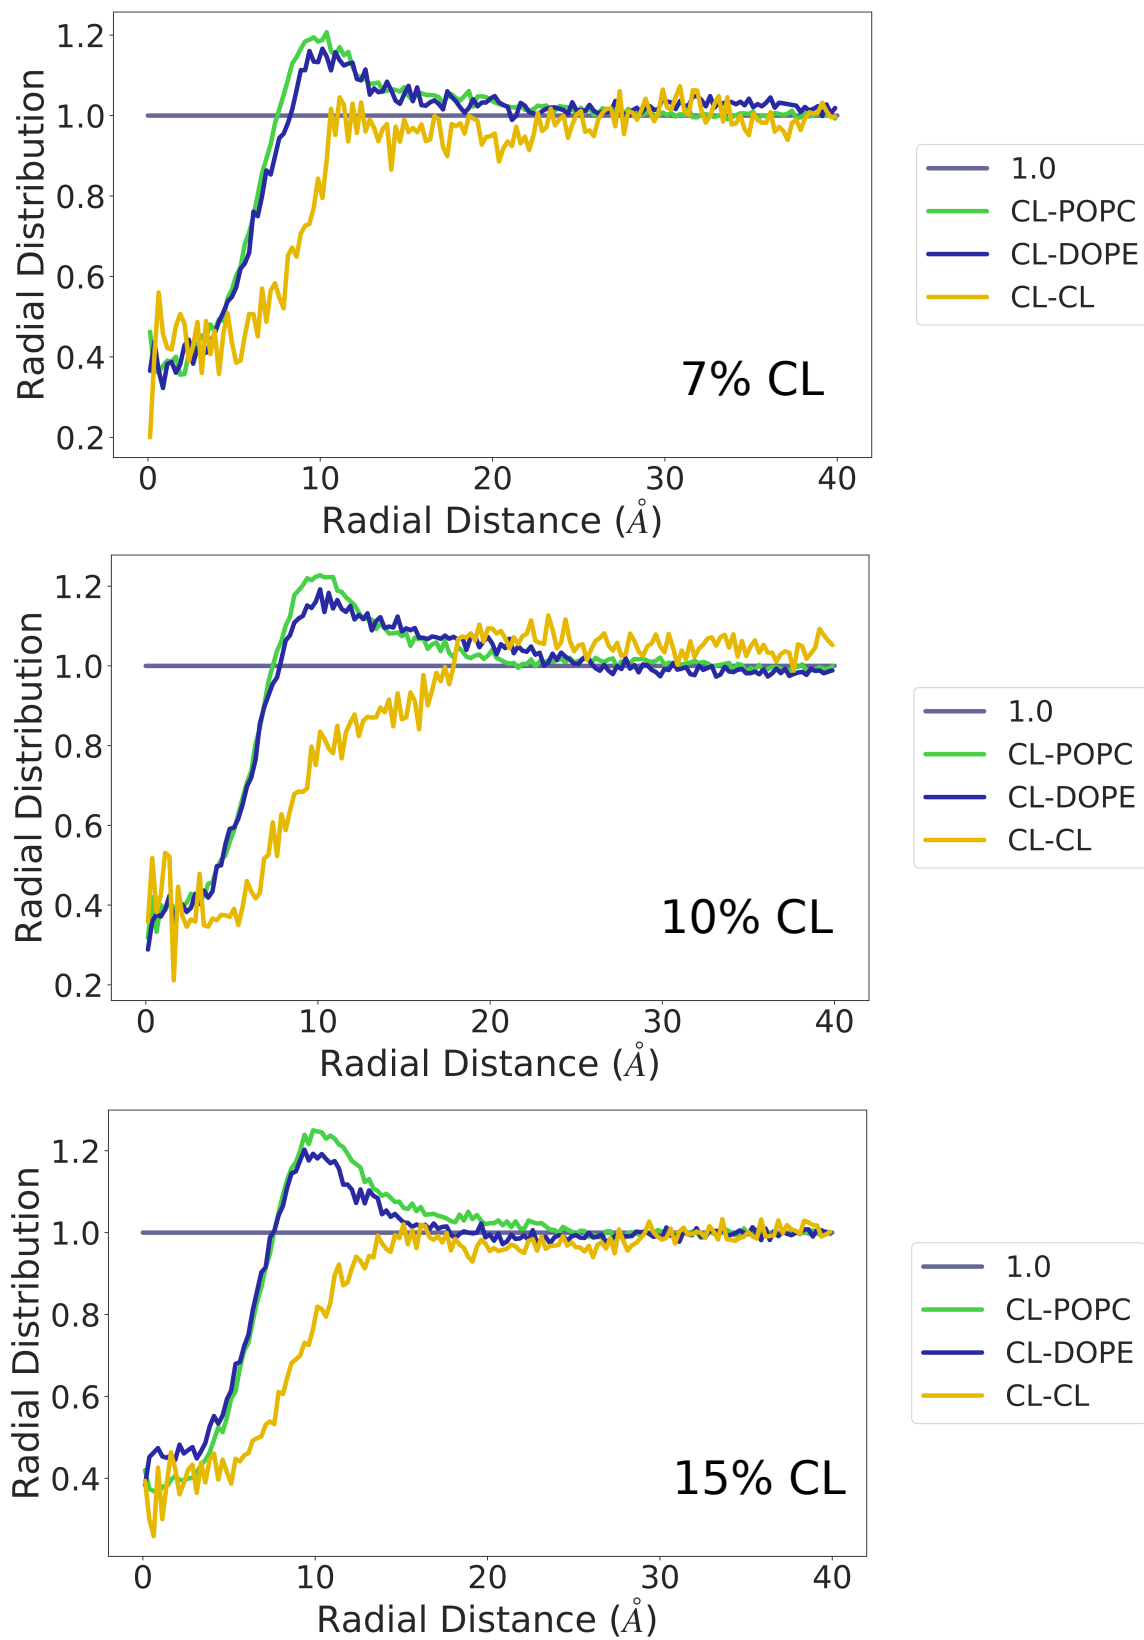

Fig. S4. CL-centric radial distribution functions for the 7, 10, and 15 % CL bilayers.
